# Supplementary material
Source: PubMed Central journal article supplement (PMC3107572)
Supplement: NIHMS293251-supplement-Online_suppl.pdf [file NIHMS293251-supplement-Online_suppl.pdf]

**Online supplement**

Contribution of hypoxia inducible factor-1 $\alpha$  to the profibrotic action of angiotensin II  
in cultured renal medullary interstitial cells

Zhengchao Wang, Lin Tang, Fan Yi, Fan Zhang, Pin-Lan Li, Ningjun Li

Department of Pharmacology & Toxicology,  
Medical College of Virginia,  
Virginia Commonwealth University,  
Richmond, VA 23298

Send Correspondence to: Dr. Ningjun Li  
Department of Pharmacology & Toxicology  
Medical College of Virginia Campus  
Virginia Commonwealth University  
P.O. Box 980613  
Richmond, VA 23298  
Phone: (804) 828-2071  
Fax: (804) 828-4794  
E-mail: nli@vcu.edu

Sources of support: National Institutes of Health Grants HL89563 and DK54927.

Running Title: Hypoxia inducible factor-1 $\alpha$  and renal fibrosis

**Supplement results**

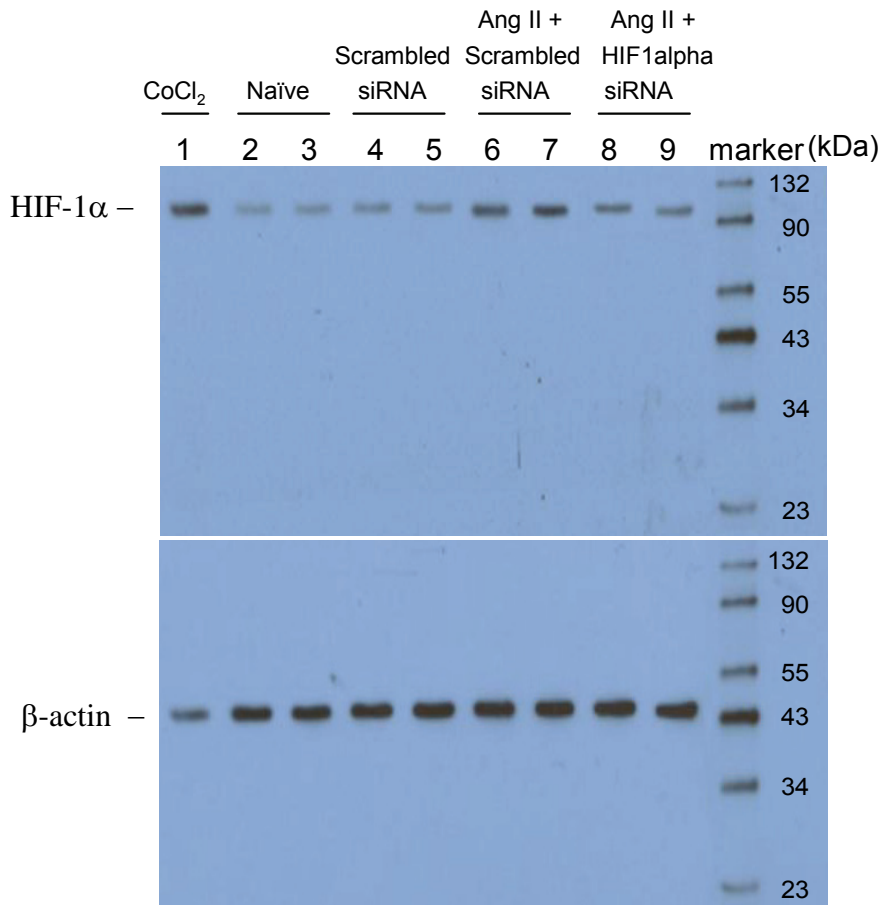

**Figure 1.** Representative ECL gel documents of Western blot analysis with full size markers depicting the location of HIF-1 $\alpha$  blots. The sample from CoCl<sub>2</sub>-treated cells was used as a positive control to further clarify the size of HIF-1 $\alpha$  blots.

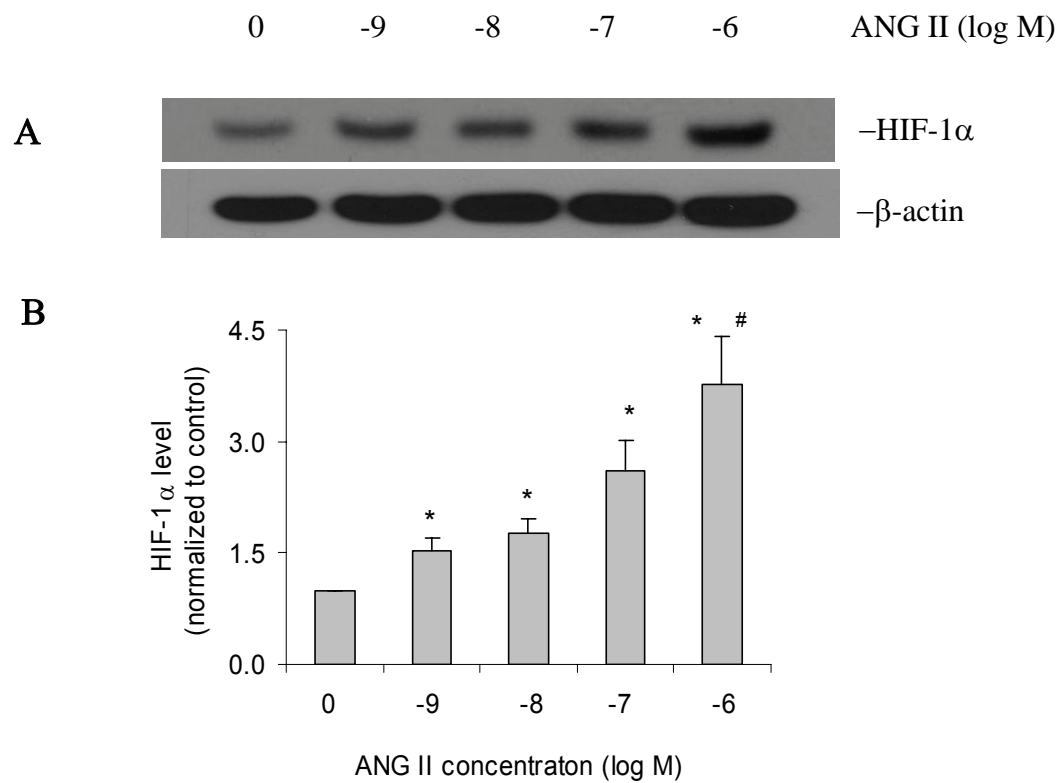

**Figure 2. Effect of ANG II on HIF-1 $\alpha$  levels at different concentrations in RMICs by Western blot analysis.** Panel A: representative ECL gel documents of Western blot analyses depicting the protein levels of HIF-1 $\alpha$ . Panel B: summarized intensities of HIF-1 $\alpha$  blots normalized to control. \* P < 0.05 vs. control, # P < 0.05 vs. -8 (n=3).

**A**

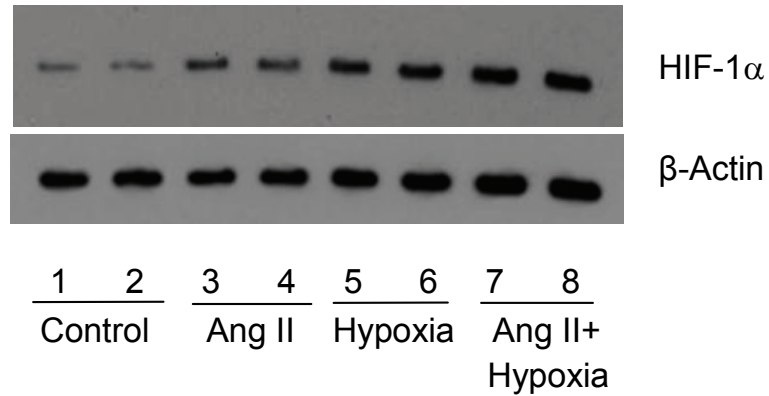

**B**

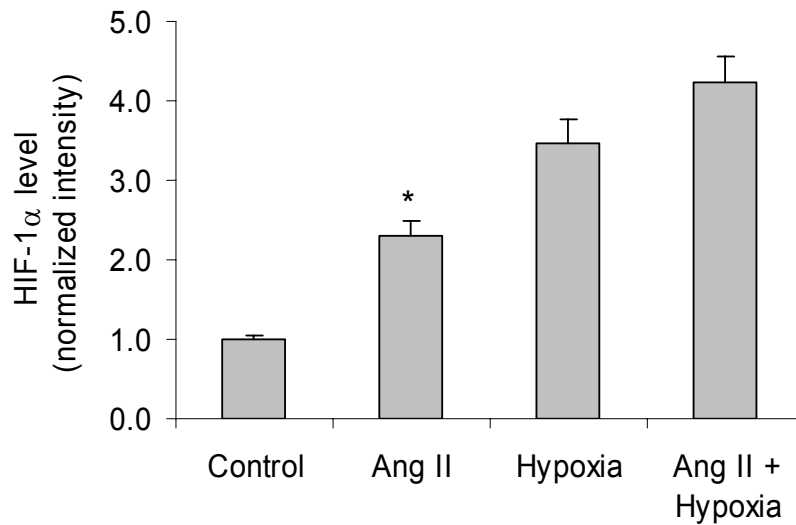

**Figure 3.** HIF1 $\alpha$  protein level in the RMICs treated with Ang II and/or hypoxia (1% O<sub>2</sub> for 4 hours). \* P < 0.05 vs. all other groups (n = 6). P = 0.11 Hypoxia vs. ANG II + Hypoxia.

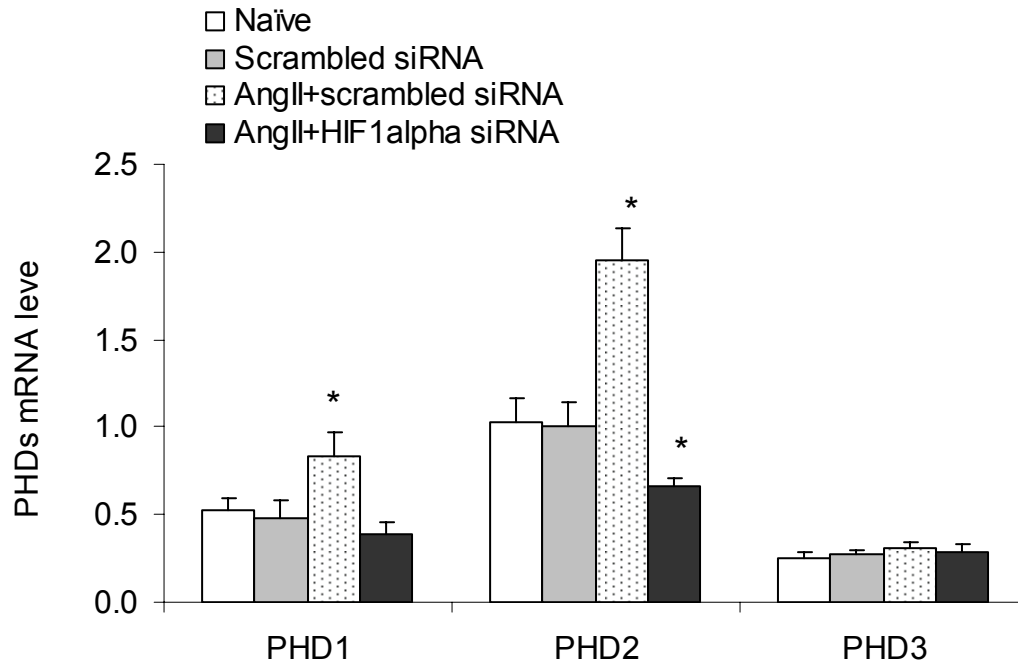

**Figure 4. Effect of ANG II and HIF-1 $\alpha$  siRNA on the mRNA levels of PHD1, 2 and 3 in RMCs by Real-time RT-PCR analysis. \*P < 0.05 vs. all other groups within the same PHD isoform (n=6).**

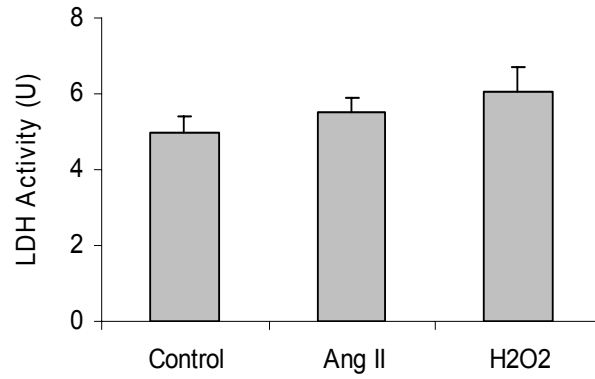

**Figure 5.** Effect of ANG II and H<sub>2</sub>O<sub>2</sub> on lactate dehydrogenase (LDH) activity (assay kit, Cayman). (n=6)

### **Expanded Materials and Methods**

*Preparation of nuclear extracts and cytosolic protein, Western blot analyses for protein levels of HIF-1 $\alpha$ , TIMP-1, collagen I/III and PHD2.* Nuclear protein was prepared as we described previously (1). Briefly, cells were scraped and washed with PBS by centrifugation at 1,000 x g for 5 min, and then homogenized with a glass homogenizer in ice-cold HEPES buffer (A) containing 10 mM HEPES (pH 7.9), 1.5 mM MgCl<sub>2</sub>, 10 mM KCl, 0.5 mM dithiothreitol (DTT), 0.5 mM phenylmethylsulfonyl fluoride (PMSF) and 10% Nonidet P-40. After centrifugation of the homogenate at 1,000 x g for 5 min at 4°C, the supernatants were collected for cytosolic protein preparation and the pellets for nuclear protein isolation. The supernatants were centrifuged again at 6,000 x g for 10 min and resulting supernatants were used as cytosolic proteins for Western blot analyses of TIMP-1, collagen I/III and PHD2. The reason for detecting collagen I/III is that the subtype of collagen is tissue/cell specific and collagen I/III is the one expressed in renal interstitial cells.

For nuclear fraction isolation, the pellets from the first centrifugation, which contains cell nuclei, were washed with buffer A and then incubated with ice-cold HEPES buffer (B) containing 5 mM HEPES (pH 7.9), 1.5 mM MgCl<sub>2</sub>, 300 mM NaCl, 400 mM KCl, 0.2 mM EDTA, 0.5 mM DTT, 0.5 mM PMSF, and 26% glycerol for 30 min to release nuclear proteins. Next, the reaction mixtures were centrifuged at 23,000 rpm for 30 min, and the supernatant was collected and frozen in liquid nitrogen until use as nuclear extracts for Western blot analyses of HIF-1 $\alpha$  levels.

Western blot analyses were performed as described previously (1). Briefly, protein samples (20  $\mu$ g) were subjected to 10% SDS-PAGE gel electrophoresis and electrophoretically transferred onto nitrocellulose membrane. The membranes were then probed with primary antibodies overnight in cold room (4°C). After washing, the membrane was incubated for 1 h with 1:3,000 horseradish peroxidase-labeled secondary antibodies. After the membrane was washed, enhanced chemiluminescence detection solution (ECL, Pierce) was added directly to the blots on the surface carrying proteins, and the membrane was wrapped in Saran wrap and exposed to Kodak Omat film. The intensity of the blots was determined using an imaging analysis program (ImageJ, free download from <http://rsbweb.nih.gov/ij/>).

Primary antibodies used in the present study included anti-rat HIF-1 $\alpha$  (monoclonal, Novus Biologicals, 1:300 dilution), hydroxylated HIF-1 $\alpha$  (HIF-1 $\alpha$ -OH, rabbit polyclonal, Novus Biologicals, 1:500), PHD2 (rabbit polyclonal, Novus Biologicals, 1:300), TIMP-1 (monoclonal, R&D systems, 1:1000), and collagen I/III (rabbit polyclonal, Calbiochem, 1:300).

***RNA extraction and quantitative RT-PCR analysis of the mRNA levels of PNCA, Vimentin, and PHD.*** Total RNA was extracted using TRIzol solution (Life Technologies, Inc. Rockville MD) and then reverse-transcribed (RT) (cDNA Synthesis Kit, Bio-Rad, Hercules, CA). The RT products were amplified using a TaqMan Gene Expression Assays kit (Applied Biosystems). This kit contains target gene primers and FAM<sup>TM</sup> dye-labeled probes, and has been tested and optimized for the analysis of target gene expression by the manufacturer. A TaqMan Gene Expression Assays kit for detecting the levels of 18S rRNA was used as an endogenous control. The real-time quantitative PCR was performed using an iCycler iQ Real-Time PCR Detection



System (Bio-Rad) according to manufacturer's manual. The cycle threshold (Ct) values were used for calculation of gene expression in accordance with the  $\Delta\Delta\text{Ct}$  method. The Ct values of target genes were first normalized with respect to 18S ribosomal RNA levels from the same samples to obtain  $\Delta\text{Ct}$  values. The mean  $\Delta\text{Ct}$  value from the control samples was used as a reference to calculate  $\Delta\Delta\text{Ct}$  values for all samples. Relative mRNA levels were expressed by the values of  $2^{-\Delta\Delta\text{Ct}}$ .

***Superoxide ( $\text{O}_2^{\cdot-}$ ) detection by electronic spin resonance (ESR):*** The measurement of  $\text{O}_2^{\cdot-}$  by ESR was performed according to the methods in our previous studies (2-3). Cells were gently collected and suspended in modified Krebs-HEPES buffer containing deferoxamine (100  $\mu\text{M}$ ; metal chelator), and then were subsequently mixed with 1 mM of the  $\text{O}_2^{\cdot-}$ -specific spin trap 1-hydroxy-3-methoxycarbonyl-2,2,5,5-tetramethylpyrrolidine (CMH) in the presence or absence of manganese-dependent SOD (500 U/ml). The cell mixture was then loaded in glass capillaries and immediately kinetically analyzed for  $\text{O}_2^{\cdot-}$  production for 10 min by an ESR system (Miniscope MS200, Noxygen Science Transfer & Diagnostics GmbH, Denzlingen, Germany). The SOD-inhibitable fraction of the signals were normalized by protein concentration and compared among different experimental groups. The ESR settings were as follows: biofield, 3,350; field sweep, 60 G; microwave frequency, 9.78 GHz; microwave power, 20 mW; modulation amplitude, 3 G; 4,096 points of resolution; receiver gain, 100; and kinetic time, 10 min.

***Fluorescence spectrometric assay of  $\text{H}_2\text{O}_2$  concentrations.*** Amplex red is a fluorogenic substrate with very low background fluorescence; it reacts with  $\text{H}_2\text{O}_2$  with a 1:1 stoichiometry to produce highly fluorescent resorufin (4). Fluorescence spectrometric assay of  $\text{H}_2\text{O}_2$  levels in

culture medium was performed using an Amplex red kit (Molecular Probes, Eugene, OR) as we described previously (5). Briefly, 200  $\mu$ M Amplex red reagent and 1 U/ml horseradish peroxidase were added to the experimental culture media (50  $\mu$ l), blank culture media containing a series of H<sub>2</sub>O<sub>2</sub> standard and blank culture medium alone as a control for background fluorescence, and the samples were then incubated for 30 min in Falcon 96-well microplates in the dark at room temperature. Fluorescence intensity was measured in an automatic microplate reader (model KC<sub>4</sub>, Bio-Tek Instruments, Winooski, VT) at an excitation wavelength of 530  $\pm$  25 nm and an emission wavelength of 590  $\pm$  35 nm. After subtraction of background fluorescence, H<sub>2</sub>O<sub>2</sub> concentrations in culture media were calculated on the basis of a H<sub>2</sub>O<sub>2</sub> standard curve generated using H<sub>2</sub>O<sub>2</sub> and Amplex red. Both the results of O<sub>2</sub><sup>-</sup> and H<sub>2</sub>O<sub>2</sub> were normalized with total cell numbers in each dish.

#### Reference

1. Li N, Yi F, Sundry CM, *et al.*: Expression and actions of HIF prolyl-4-hydroxylase in the rat kidneys. *Am J Physiol Renal Physiol* 2007; 292:F207-216.
2. Zhang AY, Yi F, Jin S, *et al.*: Acid Sphingomyelinase and Its Redox Amplification in Formation of Lipid Raft Redox Signaling Platforms in Endothelial Cells. *Antioxidants & Redox Signaling* 2007; 9:817-828.
3. Zhang G, Zhang F, Muh R, *et al.*: Autocrine/paracrine pattern of superoxide production through NAD(P)H oxidase in coronary arterial myocytes. *Am J Physiol Heart Circ Physiol* 2007; 292:H483-495.

4. Mohanty JG, Jaffe JS, Schulman ES, *et al.*: A highly sensitive fluorescent micro-assay of H<sub>2</sub>O<sub>2</sub> release from activated human leukocytes using a dihydroxyphenoxazine derivative. *J Immunol Methods* 1997; 202:133-141.
5. Li N, Zhang G, Yi F-X, *et al.*: ACTIVATION OF NAD(P)H OXIDASE BY OUTWARD MOVEMENTS OF H<sup>+</sup> IONS IN RENAL MEDULLARY THICK ASCENDING LIMB OF HENLE. *Am J Physiol Renal Physiol* 2005:00416.02004.
